# Supplementary material for: Cathepsin B-Responsive Liposomes for Controlled Anticancer Drug Delivery in Hep G2 Cells
Source: MDPI journal article supplement (doi:10.3390/pharmaceutics12090876), 2020-09-14
Supplement: s1 [file s1]

# Supplementary Materials: Cathepsin B-Responsive Liposomes for Controlled Anticancer Drug Delivery in Hep G2 Cells

Seulgi Lee, Su Jeong Song, Jeil Lee, Tai Hwan Ha and Joon Sig Choi

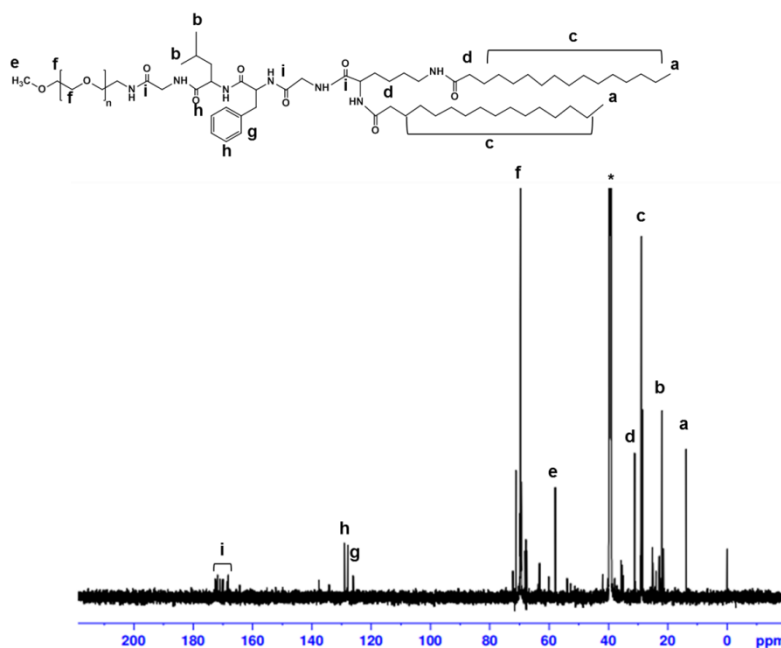

**Figure S1.** <sup>13</sup>C-NMR spectrum of PEG-GLFG in DMSO-d<sub>6</sub> (600MHz).

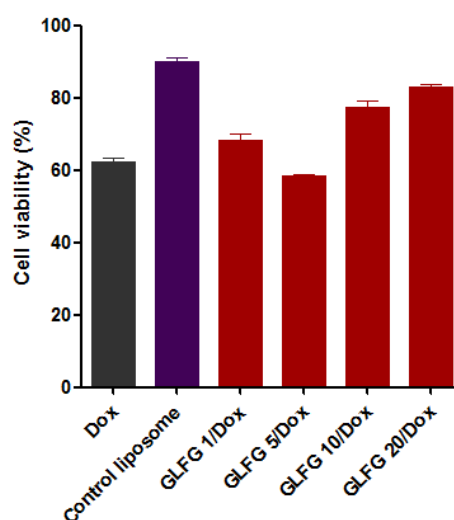

**Figure S2.** The cytotoxicity effect of GLFG liposomes at various compositions with encapsulated Dox (final 2.5 uM) on Hep G2 cells.
